# Supplementary material for: PLATINUM SENSITIVE 2 LIKE impacts growth, root morphology, seed set, and stress responses
Source: PubMed Central journal article supplement (PMC5498030; doi:10.1371/journal.pone.0180478), 2017-07-05
Supplement: pone.0180478.s001.pdf [file pone.0180478.s001.pdf]

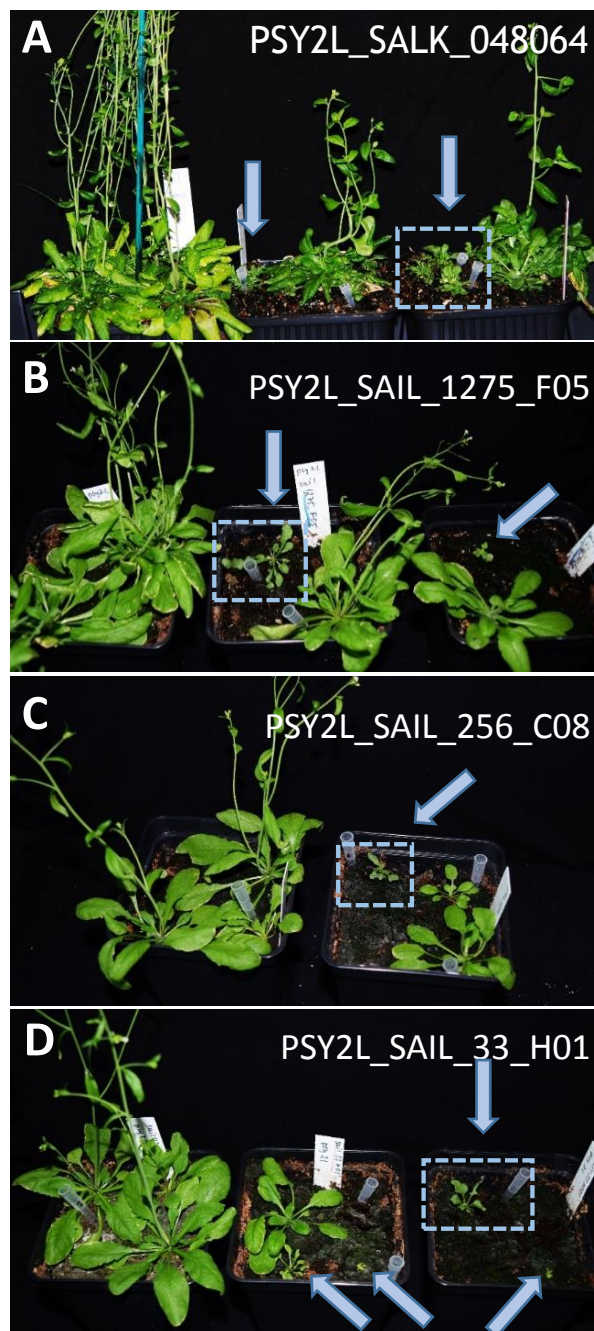

**S1 Fig. Identification of *psy2l* knockout SALK and SAIL T-DNA lines.**

**A-D**, The far left pots have WT only, other pots contain mutants heterozygous or homozygous for the T-DNA insert. Arrows indicate plants homozygous for the inserts. The dwarf phenotype was observed for the SALK (A) and three SAIL lines (B-D). Plants had been grown for two months.
