# Supplementary material for: PLATINUM SENSITIVE 2 LIKE impacts growth, root morphology, seed set, and stress responses
Source: PubMed Central journal article supplement (PMC5498030; doi:10.1371/journal.pone.0180478), 2017-07-05
Supplement: pone.0180478.s002.pdf [file pone.0180478.s002.pdf]

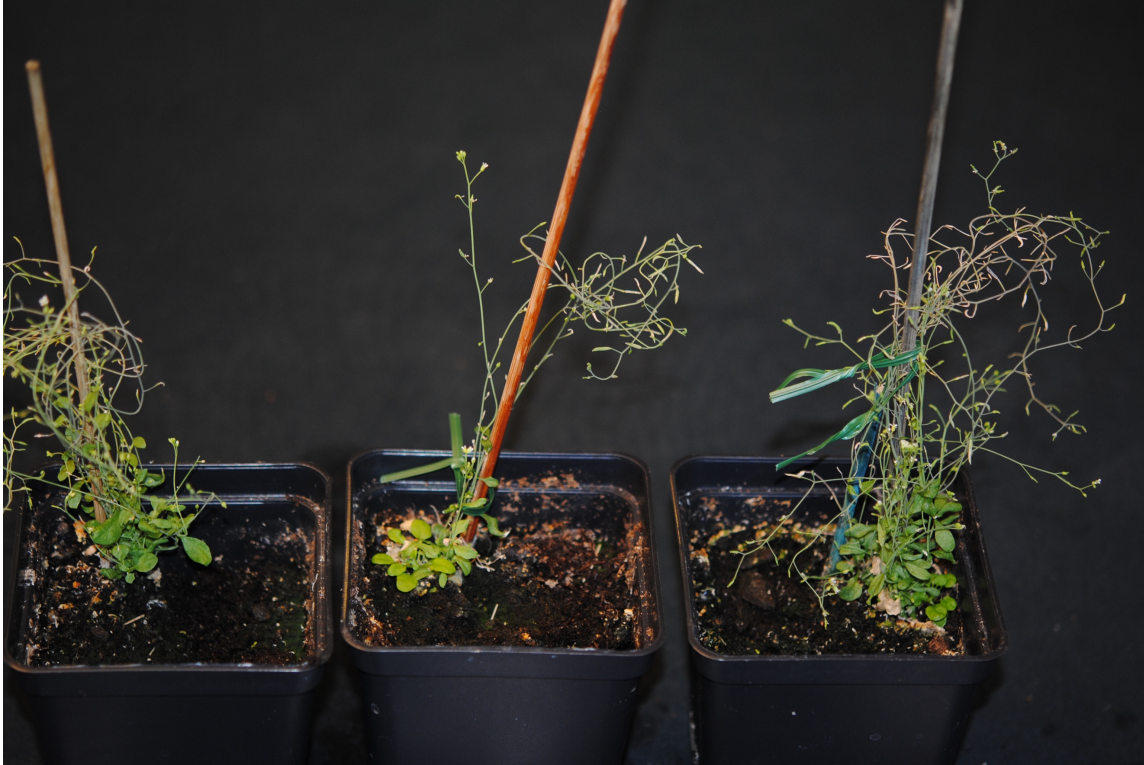

**S2 Fig. *Psy2l* mutants grown for 5 months.**

The three SAIL lines had a bushy appearance and were very small, like the SALK\_048064 line. Plants continued to grow long after the WT plants had wilted, but produced only very few seeds. From left to right: SAIL\_256\_C08, SAIL\_33\_H01, SAIL\_1275\_F05. Pots are 9 cm wide.
