# Supplementary material for: PLATINUM SENSITIVE 2 LIKE impacts growth, root morphology, seed set, and stress responses
Source: PubMed Central journal article supplement (PMC5498030; doi:10.1371/journal.pone.0180478), 2017-07-05
Supplement: pone.0180478.s005.pdf [file pone.0180478.s005.pdf]

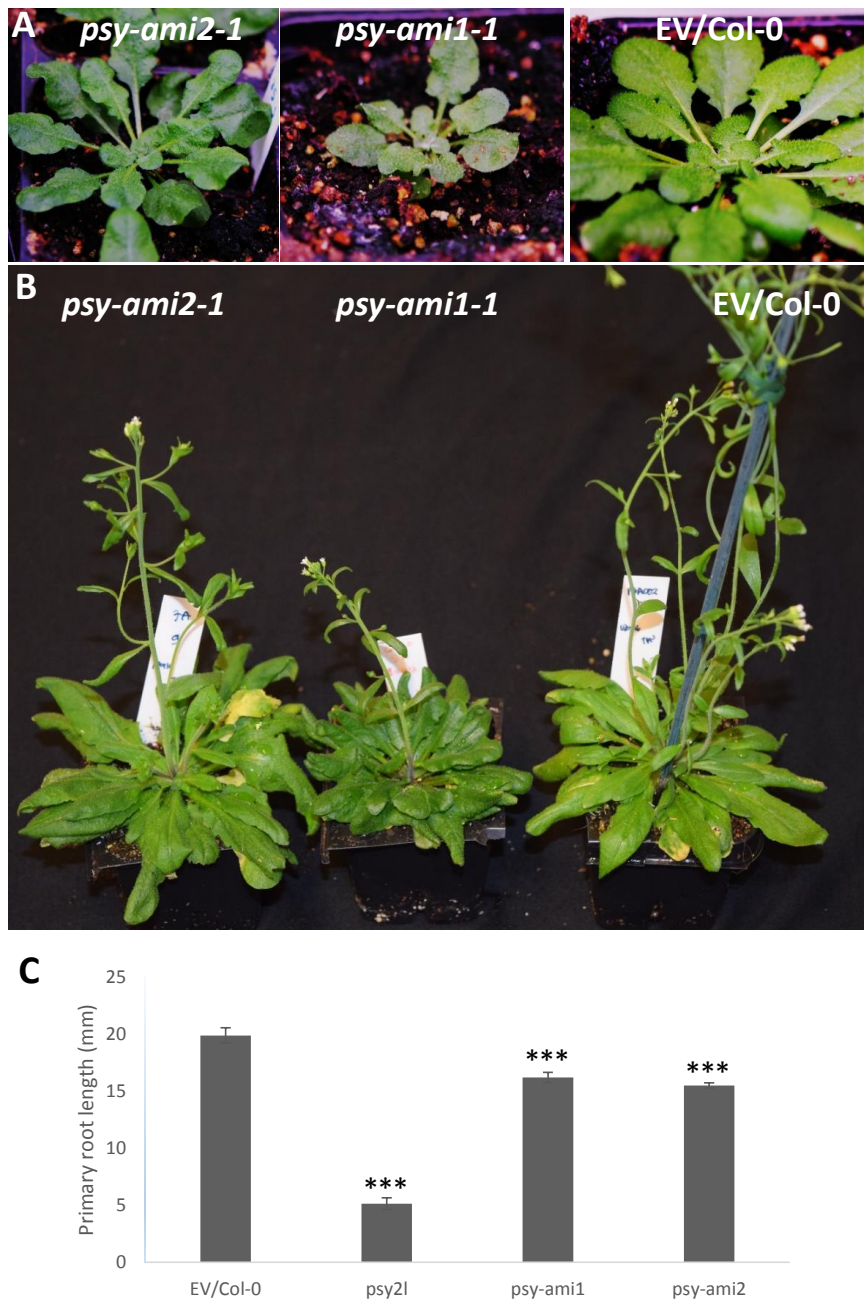

**S5 Fig. Representative images for the *PSY2L* knock-down amiRNA stable transgenic lines.**

**A**, Five and **B**, eight weeks old plants showed differences between control plants (EV/Col-0) and the two amiRNA transgenic lines that were designed to knock down *PSY2L*. Although not dwarf as the *psy2l* (T-DNA knockout mutant), the amiRNA plants showed clearly delayed flowering, distinct leaf shape, and shorter roots. **C**, Mean primary root length of six days old seedlings which were allowed to grow vertically. Mean values and standard errors are depicted, n=30. Compared with the EV/Col-0 control, roots were significantly shorter in *psy2l* (SALK\_048064) and both amiRNA lines, \*p<0.001.
