# Supplementary material for: PLATINUM SENSITIVE 2 LIKE impacts growth, root morphology, seed set, and stress responses
Source: PubMed Central journal article supplement (PMC5498030; doi:10.1371/journal.pone.0180478), 2017-07-05
Supplement: pone.0180478.s007.pdf [file pone.0180478.s007.pdf]

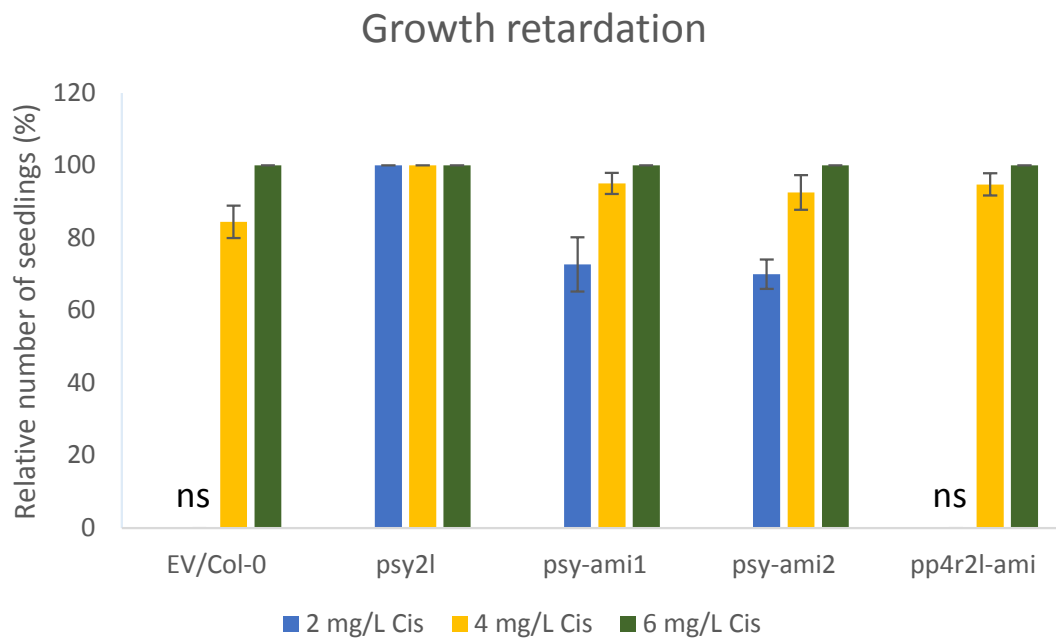

**S7 Fig. *PSY2L* knockout and knockdown mutants show severe growth retardation upon cisplatin treatment.** After growing three days on  $\frac{1}{2}$  MS medium with 1% sucrose, seedlings were transferred to new media for another 12 d for treatment with 0, 2, 4, or 6 mg L<sup>-1</sup> cisplatin (See main text Fig 4). Percentage of seedlings showing strong growth retardation was visually observed. The experiments were repeated 3 times, and totally there were 30-40 seedlings for each plant type and concentration of cisplatin. SE is given. EV/Col-0 and *pp4r2l-ami* seedlings at 2 mg L<sup>-1</sup> cisplatin were not different from zero cisplatin control (ns, not significant), but *psy2l* (SALK) and *psy-ami* seedlings showed significant growth retardation at 2 mg L<sup>-1</sup> cisplatin,  $p < 0.01$ . Higher cisplatin concentrations (4-6 mg L<sup>-1</sup>) gave growth retardation for all seedlings at  $p < 0.01$ .
