# Supplementary material for: PLATINUM SENSITIVE 2 LIKE impacts growth, root morphology, seed set, and stress responses
Source: PubMed Central journal article supplement (PMC5498030; doi:10.1371/journal.pone.0180478), 2017-07-05
Supplement: pone.0180478.s013.pdf [file pone.0180478.s013.pdf]

| Subcellular localization primers |           |                            |                                       |                 |       |                                 |
|----------------------------------|-----------|----------------------------|---------------------------------------|-----------------|-------|---------------------------------|
| Gene                             | AGI       | Name                       | Primer                                | Fusion protein  | R.S.  | Template                        |
| PP4-1                            | At4g26720 | AK72F                      | ATGCGGCCGCTATGTCAGACCTAGATCGGCAAA     | EYFP-PP4-1      | NotI  | PP4-1/Ws<br>Jose<br>Serrano/CNB |
|                                  |           | AK73R                      | ATCCCGGTTATAGGAAGTAATCAGGGG           | EYFP-PP4-1      | SacII |                                 |
|                                  |           | AK74F                      | ATGAGCTCTCATGTCAGACCTAGATCGGCA        | PP4-1-EYFP      | SacI  |                                 |
|                                  |           | AK75R                      | ATGCGGCCGCTAGGAAGTAATCAGGGGCCG        | PP4-1-EYFP      | NotI  |                                 |
| PP4-2                            | At5g55260 | AK76F                      | ATGCGGCCGCTATGTCAGACCTAGACAAGCAA      | EYFP-PP4-2      | NotI  | U83558                          |
|                                  |           | as AK73R                   | ATCCCGGTCACAGGAAATAATCAGGTG           | EYFP-PP4-2      | SacII |                                 |
|                                  |           | AK77F                      | ATCCATGGGTATGTCAGACCTAGACAAGCA        | PP4-2-EYFP      | NcoI  |                                 |
|                                  |           | as AK75R                   | ATGCGGCCGCCAGGAAATAATCAGGTGCAG        | PP4-2-EYFP      | NotI  |                                 |
| PP4-1                            |           | AK74F_b2014                | ATGAGCTCTCATGTCAGACCTAGATCGGCAAATAG   | PP4-1-EYFP      | SacI  |                                 |
|                                  |           | AK75R_b2014                | ATGCGGCCGCTAGGAAGTAATCAGGGGCCGGCTT    | EYFP-PP4-1 or 2 | NotI  |                                 |
| PP4-2                            |           | AK77F_b2014                | ATCCATGGGTATGTCAGACCTAGACAAGCAAATAGAG | EYFP-PP4-2      | NcoI  |                                 |
|                                  |           |                            |                                       |                 |       |                                 |
| PP4R2L                           | At5g17070 | EYFP_PP4R2 (At5g17070.1)F  | AAAGCGCCGCTATGGAGAATCCGTCATCATCG      | EYFP_PP4R2L     | NotI  | U24915                          |
|                                  |           | EYFP_PP4R2 (At5g17070.1)R  | ATTCCCGCGCTAGGCACACGTTGTAGGCAA        | EYFP_PP4R2L     | SacII |                                 |
|                                  |           | PP4R2_EYFP (At5g17070.1)F  | ATCCATGGGTATGGAGAATCCGTCATCATCG       | PP4R2L_EYFP     | NcoI  |                                 |
|                                  |           | PP4R2_EYFP(At5g17070.1)R   | AAGCGCCCGCGGCACACGTTGTAGGCAACCG       | PP4R2L_EYFP     | NotI  |                                 |
| PSY2L                            | At3g06670 | EYFP_PSY2L (At3g06670.1)F  | AAAGCGCCGCTATGGGCGCTCCGGAAAAGTCT      | EYFP_PSY2L      | NotI  | U21916                          |
|                                  |           | EYFP_PSY2L (At3g06670.1)R  | ATTGCGCCGCTCAGGATCCATTTACAGCCAT       | EYFP_PSY2L      | NotI  |                                 |
|                                  |           | PSY2L_EYFP(At3g06670.1)F   | ATCCATGGGTATGGGCGCTCCGGAAAAGTCT       | PSY2L_EYFP      | NcoI  |                                 |
|                                  |           | PSY2L_EYFP (At3g06670.1)R  | ATTGCGCCCGGATCCATTTACAGCCAT           | PSY2L_EYFP      | NotI  |                                 |
| <b>T_DNA genotyping primers</b>  |           |                            |                                       |                 |       |                                 |
|                                  |           | PP4-1-(SALK_070977)-LP     | TTGTATCCAGCCCGTTATTTG                 |                 |       |                                 |
|                                  |           | PP4-1-(SALK_070977)-RP     | AGAATTCCGTGTGTTTATGTC                 |                 |       |                                 |
|                                  |           | PP4-1.(GK_651B07)-LP       | ACAAAATCAAAGACACGGTTCG                |                 |       |                                 |
|                                  |           | PP4-1.(GK-651B07)-RP       | TAAAGACACAAAATCTCCGCG                 |                 |       |                                 |
|                                  |           | PP4-2-(SAIL_569_H09)-LP    | TGGAGAGAGACCTCCATGAAC                 |                 |       |                                 |
|                                  |           | PP4-2-(SAIL_569_H09)-RP    | ATAGAGCAGCTTAAACGCTGC                 |                 |       |                                 |
|                                  |           | PP4-2-(SALK_049725C)LP     | TTCATGGAGGTCTCTCTCCAG                 |                 |       |                                 |
|                                  |           | PP4-2-(SALK_049725C)RP     | AACGATGACCTTGCAATTTTG                 |                 |       |                                 |
|                                  |           | PSY2L_SALK_048064_LP       | ATGTTTCGCCTGTTCAATCAC                 |                 |       |                                 |
|                                  |           | PSY2L_SALK_048064_RP       | TGTTGAATTGAGATGGAAGGG                 |                 |       |                                 |
|                                  |           | PSY2L_SALK_125872_LP       | AAGCCTCTGAGGATGAGGAAG                 |                 |       |                                 |
|                                  |           | PSY2L_SALK_125872_RP       | AAATGAATATGGCTTTTGGGG                 |                 |       |                                 |
|                                  |           | PSY2L_SAIL_1275_F05_LP     | AGGCGCATCTGATCTGTAATG                 |                 |       |                                 |
|                                  |           | PSY2L_SAIL_1275_F05_RP     | CTTCAAGAGACTGCAGGGTG                  |                 |       |                                 |
|                                  |           | PSY2L_SAIL_33_H01_LP       | TCTCTTCTCTTCTTTCCGG                   |                 |       |                                 |
|                                  |           | PSY2L_SAIL_33_H01_RP       | AATATCCTCAGGGTTGATGGG                 |                 |       |                                 |
|                                  |           | PSY2L_SAIL_256_C08_LP      | TGTACCGTTTTTGAATCTGTGC                |                 |       |                                 |
|                                  |           | PSY2L_SAIL_256_C08_RP      | GTGCTCAAGCAGATCCAAGAC                 |                 |       |                                 |
|                                  |           | PP4R2L_SALK_093041_LP      | CAACATATTTGGCATTGTTGGC                |                 |       |                                 |
|                                  |           | PP4R2L_SALK_093041_RP      | TGTTCAACAGATCCTTTTGGC                 |                 |       |                                 |
|                                  |           | LB1 for SAIL C/418-451     | GCCTTTTCAGAAATGGATAAATAGCCTTGCTTCC    |                 |       |                                 |
|                                  |           | LBa1 for SALK/pBIN-pROK2   | TGTTACAGTAGTGGCCATCG                  |                 |       |                                 |
|                                  |           | LBb1.3 for SALK/pBIN-pROK2 | ATTTTGCCGATTTTCGGAAC                  |                 |       |                                 |
|                                  |           | 8474_GABI-Kat LB-FSTs      | ATAATAACGCTGCGGACATCTACATTTT          |                 |       |                                 |

| On gel RT-PCR primers         |               |                           |                                           |                       |               |
|-------------------------------|---------------|---------------------------|-------------------------------------------|-----------------------|---------------|
| PP4-1                         |               | AK108-F_PP4-1_RT          | TTTGGACTACATGAGTCTTTTCAGCTGTTG            |                       |               |
|                               |               | AK109-R_PP4-1_RT          | TTGATGGGCACGGGCTATGTAGTCT                 |                       |               |
| PP4-2                         |               | AK110-F_PP4-2_RT          | TTCTAGCTCTCAAAGTTAGATATCCAGAC             |                       |               |
|                               |               | AK111-R_PP4-2_RT          | TAGCTGATGAGCTCGACATATGTAATCA              |                       |               |
| PP4R2L                        |               | RT_PP4R2L_Front1_LP       | GAGATTTCTCCGTCGTTCA                       |                       |               |
|                               |               | RT_PP4R2L_Front1_RP       | ATCCGTCATTTTTGCCTCAG                      |                       |               |
|                               |               | RT_PP4R2L_Back2_LP        | GCAATGACTGTTGACATGGA                      |                       |               |
|                               |               | RT_PP4R2L_Back2_RP        | TAGGCAACCGTGAATCTCCT                      |                       |               |
|                               |               | RT_PP4R2L_Back3_LP        | TGGAAACAATCGATGAACCA                      |                       |               |
|                               |               | RT_PP4R2L_Back3_RP        | AAACCAGAAATTCACAAAAACA                    |                       |               |
|                               | Full CDS      | EYFP_PP4R2 (At5g17070.1)F | AAAGCGCCGCTATGGAGAATCCGTCATCATCG          |                       |               |
|                               | Full CDS      | EYFP_PP4R2 (At5g17070.1)R | ATTCCGCGGCTAGGCACACGTTGTAGGCAA            |                       |               |
| PSY2L                         |               | RT_PSY2L_LP               | CTCATGGAGAGACCCAGAGC                      |                       |               |
|                               |               | RT_PSY2L_RP               | CCATCAGATTCGGGAAGAAA                      |                       |               |
| Stable amiRNA lines           |               |                           |                                           |                       |               |
| amiRNA                        |               |                           |                                           | amiRNA seurence       | Binary vector |
| 1                             | PP4-1 + PP4-2 | 1-I miR-s                 | GATAATGAGAGTTATACGGTCTATCTCTCTTTTGTATTCC  | TAATGAGAGTTATACGGTCTA | pBA002        |
|                               |               | 2-II miR-a                | GATAGACCGTATAACTCTCATTATCAAAGAGAATCAATGA  |                       |               |
|                               |               | 3-III miR*s               | GATAAACCGTATAACACTCATTTCACAGGTCGTGATATG   |                       |               |
|                               |               | 4-IV miR*a                | GAAAATGAGTGTATACGGTTTATCTACATATATATTCC    |                       |               |
| 2                             | PP4-1 + PP4-2 | 5-I miR-s                 | GATAAAAGACGTAACAACGCTGTCTCTTTTGTATTCC     | TTAAAAGACGTAACAACGCTG | pBA002        |
|                               |               | 6-II miR-a                | GACAGCGTTGTTACGCTTTTTAATCAAAGAGAATCAATGA  |                       |               |
|                               |               | 7-III miR*s               | GACAACGTTGTTACGACTTTTATTCACAGGTCGTGATATG  |                       |               |
|                               |               | 8-IV miR*a                | GAATAAAAGTCGTAACAACGTTGTCTACATATATATTCC   |                       |               |
| 1                             | PSY2L         | I miR-s                   | GATAAATAAGTTCAGTTAGGCGTTCTCTCTTTTGTATTCC  | TAAATAAGTTCAGTTAGGCGT | pBA002        |
|                               |               | II miR-a                  | GAACGCCTAACTGAACTTATTTATCAAAGAGAATCAATGA  |                       |               |
|                               |               | III miR*s                 | GAACACCTAACTGAAGTTATTTTCACAGGTCGTGATATG   |                       |               |
|                               |               | IV miR*a                  | GAAAAATAACTTCAGTTAGGTGTTCTACATATATATTCC   |                       |               |
| 2                             | PSY2L         | I miR-s                   | GATTACTATGGCATTGTTGCGACTCTCTCTTTTGTATTCC  | TTACTATGGCATTGTTGCGAC | pBA002        |
|                               |               | II miR-a                  | GAGTGCGAACAATGCCATAGTAATCAAAGAGAATCAATGA  |                       |               |
|                               |               | III miR*s                 | GAGTACGAACAATGCCGATAGTATTCACAGGTCGTGATATG |                       |               |
|                               |               | IV miR*a                  | GAATACTATCGCATTGTTTCGTACTCTACATATATATTCC  |                       |               |
| 1                             | PP4R2L        | I miR-s                   | GATATCCGATAATGGTCGTGCAGTCTCTCTTTTGTATTCC  | TATCCGATAATGGTCGTGCAG | pBA002        |
|                               |               | II miR-a                  | GACTGCACGACCATTATCGGATATCAAAGAGAATCAATGA  |                       |               |
|                               |               | III miR*s                 | GACTACACGACCATTTTCGGATTTTCACAGGTCGTGATATG |                       |               |
|                               |               | IV miR*a                  | GAAATCCGAAAATGGTCGTGTAGTCTACATATATATTCC   |                       |               |
| Miscellaneous primers         |               |                           |                                           |                       |               |
|                               |               | C.Term.EYFPf              | ACTACCTGAGCTACCACTCC                      |                       |               |
|                               |               | AK92r/downstream EYFP     | CCTTATCTGGGAAGTACTCAC                     |                       |               |
|                               |               | AK93f/upstream EYFP       | GCATTCTACTTCTATTGCAGC                     |                       |               |
|                               |               | AK94r/middle EYFP         | AACTTCAGGGTCAGCTTGCCGT                    |                       |               |
|                               |               | NOS                       | GATAATCATCGCAAGACCGGCAACAGGA              |                       |               |
|                               |               | A/amiRNA specific         | CTGCAAGGCGATTAAGTTGGGTAAC                 |                       |               |
|                               |               | B/amiRNA specific         | GCGGATAACAATTCACACAGGAAACAG               |                       |               |
| TaqMan® Gene Expression Assay |               |                           |                                           |                       |               |
| Gene                          | AGI           | Assay ID                  | Catalog #                                 |                       |               |

|       |           |               |         |  |  |  |
|-------|-----------|---------------|---------|--|--|--|
| PSY2L | AT3G06670 | At02236429_g1 | 4351372 |  |  |  |
| PSY2L | AT3G06670 | At02236437_g1 | 4351372 |  |  |  |
